# ESC - a comprehensive resource for SARS-CoV-2 immune escape variants

Mercy Rophina<sup>1,2</sup>, Kavita Pandhare<sup>1</sup>, Afra Shamnath<sup>1</sup>, Mohamed Imran<sup>1,2</sup>, Bani Jolly<sup>1,2</sup>, Vinod Scaria<sup>1,2#</sup>

<sup>1</sup>CSIR Institute of Genomics and Integrative Biology (CSIR-IGIB), Mathura Road, New Delhi, India

<sup>2</sup>Academy of Scientific and Innovative Research (AcSIR), Ghaziabad- 201002, India

# address for correspondence

## ABSTRACT

Ever since the breakout of COVID-19 disease, ceaseless genomic research to inspect the epidemiology and evolution of the pathogen has been undertaken globally. Large scale viral genome sequencing and analysis have uncovered the functional impact of numerous genetic variants in disease pathogenesis and transmission. Emerging evidence of mutations in spike protein domains escaping antibody neutralization is reported. We have a precise collation of manually curated variants in SARS-CoV-2 from literature with potential escape mechanisms from a range of neutralizing antibodies. This comprehensive repository encompasses a total of 532 variants accounting for 146 unique variants tested against 75 antibodies and patient convalescent plasma. This resource enables the user to gain access to an extensive annotation of SARS-CoV-2 escape mutations which we hope would contribute to exploring and understanding the underlying mechanisms of immune response against the pathogen. The resource is available at <http://clingen.igib.res.in/esc/>.

**Keywords :** COVID-19, SARS-CoV-2, Neutralizing antibodies, Escape mutations, Genomes

## INTRODUCTION

Genomics approaches have been instrumental in understanding the origin and evolution of SARS-CoV-2, the causative agent for the COVID-19 pandemic (Zhang and Holmes, 2020). Availability of the genome sequence of one of the earliest SARS-CoV-2 genomes from Wuhan province (Tang et al., 2020) and high throughput approaches to resequence and analyse viral genomes have facilitated the availability of numerous open genomic data sharing initiatives by the researchers worldwide. Pioneering public sources like GenBank (GenBank Overview) and Global Initiative on Sharing all Influenza Data (GISAID) (Shu and McCauley, 2017) provide access to systematically organized genomes and genomic data of SARS-CoV-2. The China National GeneBank DataBase (CNGBdb) (Chen et al., 2020), Genome Warehouse (GWH) (Genome Warehouse) and Virus Pathogen Resource (ViPR) (Pickett et al., 2012) are few other resources which provide access to viral genomes and perform analyses on phylogeny, sequence similarity and genomic variants.

There has been a significant interest in recent times in understanding the functional impact of genetic variants in SARS-CoV-2 apart from exploring the genetic epidemiology. D614G variant in Spike protein has been one of the earliest and prominent examples with potential implications associated with the infectivity of the virus (Korber et al., 2020). Studies explaining the possible impact of SARS-CoV-2 variants in diagnostic primers and probes (Jain et al., 2020) have augmented the importance of analysing the variations in the pathogen and their underlying role in disease pathogenesis. Various resources have been made available to help comprehend the virus better and also to understand its evolution. Public sources exclusively documenting functionally relevant SARS-CoV-2 variants based on literature evidence are also available (Rophina et al.).

With the advent of therapies including monoclonal antibodies, convalescent plasma as well as the recent availability of vaccines have accelerated interest in genetic variants which could affect the efficacy of such modalities of therapy. The targeting of spike proteins by broad-neutralizing antibodies against SARS-CoV-2 offers a potential means of treating and preventing further infections of COVID-19 (Jiang et al., 2020). Evidence on immunodominant epitopes with significantly higher response rates have also been reported (Farrera-Soler et al., 2020). Antibody response to SARS-CoV-2 is one of the key immune responses to SARS-CoV-2 which is actively being pursued to develop therapeutic strategies as well as vaccines (Biswas et al., 2020). The recent months have seen enormous research into the structural and molecular architecture of the interactions between the spike protein in SARS-CoV-2 and antibodies. Studies have also provided insights into the genetic variants which could confer partial or complete resistance to antibodies (Weisblum et al., 2020) as well as panels of convalescent plasma. With vaccines being widely available, the evidence on the effect of genetic variants on efficacy of vaccines are also emerging (Williams and Burgers, 2021)

The lack of a systematic effort to compile genetic variants in SARS-CoV-2 associated with immune escape motivated us to compile the information in a relevant, searchable and accessible format. Towards this goal, we systematically evaluated publications for evidence on immune escape associated with genetic variants in SARS-CoV-2 and created a compendium - ESC. This compendium can be searched using a user friendly web interface to retrieve information on immune escape variants as well as their extensive functional annotations. To the best of our knowledge this is the first most comprehensive resource for immune escape variants for SARS-CoV-2. The resource can be accessed online at <http://clingen.igib.res.in/esc/>.

## **MATERIALS AND METHODS**

### *Data and Search Strategy*

Genetic variants in the SARS-CoV-2 genome and evidence suggesting association with immune escape were systematically catalogued. A significant number of variants were associated with escape or resistance to a range of neutralizing and monoclonal antibodies, while a small subset were associated with resistance to convalescent plasma. The data was compiled by manual curation of literature available from peer-reviewed publications and preprints and comprehending the evidence mentioned in the respective articles. Literature reports with relevant information on antibody escape variants were retrieved from sources including PubMed, LitCovid, Google Scholar and articles from preprint servers. The publications were systematically checked for details pertaining to the mutation, antibodies tested and experimental methods followed in the study. Collated data was organized in a pre-formatted template based on their protein positions. This comprehensive compendium was used for further functional annotations.

### *Variant Information and Annotations*

The variant information and annotations were retrieved from annotation tables for individual features using ANNOVAR (Wang et al., 2010). Variant annotations broadly include genic features like the variant type and functional annotations related to deleteriousness and evolutionary conservation. Information on protein domains and immune epitopes were compiled and customized from various public sources. Variant sites reported to be potentially problematic including homoplasic regions, sites with recurrent sequencing errors and hypermutable sites were also marked. Variants mapping back to sites of potential SARS-CoV-2 diagnostic primers/probes were also used for annotation (Jain et al., 2020).

### *Compilation of B-cell epitope data*

Details on B-cell epitopes spanning the protein residues of SARS-CoV-2 were retrieved from Immune Epitope Database and Analysis Resource (IEDB) (Vita et al., 2019a). All epitopes of SARS-CoV-2 (IEDB ID : 2697049) against human hosts with reported positive or negative B cell assays and any type of MHC restriction were used for analysis. Epitope information pertaining to each amino acid residue including the epitope type (Linear/discontinuous), epitope sequence with corresponding start and end positions and IEDB identifiers were systematically mapped

back and documented. With a view of analysing the impact of these mutations on B cell epitopes, potential B cell epitopes were predicted from mutated spike protein sequences using BepiPred (Jespersen et al., 2017). Curated lists of amino acid changes were incorporated in the reference spike protein sequence (YP\_009724390) and potential B cell epitopes were predicted with a default threshold value of 0.5.

#### *Antibody details and annotation*

Information pertaining to the list of antibodies associated with escape mechanisms were retrieved from available public sources. Compiled antibodies were systematically mapped back to the ABCD (for AntiBodies Chemically Defined) database which provides integrated information regarding the antibodies along with its corresponding antigens and protein cross links to fetch unique antibody identifiers (Page et al., 2016; Lima et al., 2020).

#### *Database and Web Interface*

The back-end of the web interface was implemented using Apache web server and MongoDB v3.4.10. to provide a user friendly interface for variant search. The JavaScript Object Notation (JSON) file format was used to systematically store the data. PHP 7.0, AngularJS, HTML, Bootstrap 4, and CSS were used to code the web interface for querying. Highcharts javascript library was also used for improved presentation and interactivity.

## **RESULTS & DISCUSSION**

#### *Repository of SARS-CoV-2 escape mutations*

We compiled a total of 532 entries from 19 recent publications which studied SARS-CoV-2 variants and their effect on immune escape. This encompassed a total of 146 unique variants spanning spike protein, ORF1ab and ORF3a. Of the total unique variants, 143 variants were found mapping to Spike protein while 3 variants which were reported to confer potential epitope loss were found in ORF1ab and ORF3a. The compiled list of variants were associated with 75 unique SARS-CoV-2 antibodies and patient polyclonal sera. Summary of compiled variants along with their associated antibodies are listed in **Table 1**. The variant annotations encompassed 23 unique data features retrieved from multiple databases and datasets and mapped using ANNOVAR. The data features used in the study are summarised in **Supplementary Table 1**.

#### *Antibody association mapping*

By scanning through the spike protein residues and their associations with SARS-CoV-2 neutralizing and monoclonal antibodies, we were able to compile the exact count of antibodies reported to have potential associations with the residues. Antibody - amino acid residue mapping observed in Spike protein and in Receptor binding domain is represented in **Figures 1, 2 and 3**. From our analysis we were able to observe that spike protein residues ranging from 350 to 500 exhibited potential antibody associations. 9 hotspot residues (417, 444, 445, 450, 475, 484, 486, 490, 493) were found associated with escape from >10 monoclonal antibodies.

### *Overview of B cell epitopes and immunodominant epitope regions*

There were a total of 310 experimentally validated B cell epitopes including 263 linear and 47 discontinuous epitopes in Spike protein. Reported B cell epitope information was mapped back to residues possessing antibody escape mutations. Also for every escape mutation B-cell epitopes were predicted using BepiPred-2.0 (Jespersen et al., 2017){ref} using default options to see if any existing epitopes were affected when compared with reference sequence. We observed that 18 escape mutations caused complete loss of epitope given for that mutation.

### *Database features*

The resource offers a user friendly interface enabling the users to search for variants based on their amino acid change, gene name or the antibody name as per the specified format. The search query returns a list of matching results, whose complete functional annotations can be viewed by clicking on the displayed elements. The resource provides a list of annotation features for each variant precisely organized into 5 major sections namely Variant details, Antibody details, Domain and Epitope details, Functional annotation and Variant frequency.

**Figure 3a and b** portrays the query search and the result display section of the resource

Basic details pertaining to the variant like the amino acid change, genomic variation and the mutation type are enlisted in the Variant Details section. Information on the associated neutralizing antibodies and their identifiers are provided in the Antibody details section. Domain and epitope details section exclusively comprises details on the protein domain, epitopes reported to span the protein residue through experimental validations. Computationally predicted functional annotations on deleteriousness from SIFT (Ng and Henikoff, 2003), evolutionary conservation scores provided by PhastCons (Siepel and Haussler), GERP (Cooper, 2005) and PhyloP (Pollard et al., 2010) are included in the Functional annotation section. This section also enlists protein domain information retrieved from UniProt and immune epitopes documented from IEDB (Vita et al., 2019a, 2019b), UCSC and predictions from different software packages (B cells- BepiPred 2.0, CD4-IEDB Tepitool, CD8-NetMHCpan4). Annotations of potential error prone sites including sites of sequencing errors, homoplasic and hypermutable regions (NicolaDeMaio et al., 2020) and diagnostic primer/probe sites are also mapped.

## **CONCLUSIONS**

With evidence emerging on genetic variants in SARS-CoV-2 associated with resistance to monoclonal antibodies and convalescent plasma using *in-vitro* assays have provided a unique insight into the structural and functional mechanisms whereby the pathogen could evolve and evade antibodies. These insights could have enormous implications in efficacy of vaccines currently being used as well as under trials. A number of recent studies have reported the impact of a few immune escape variants on the efficacy of vaccines (Nelson et al., 2021). It is expected that similar studies would be extended for a wider number of variants as well as

vaccines. We therefore foresee that the ESC resource would be a central resource to enable such studies and provide a ready reference to the emerging evidence on immune escape. We also foresee more evidence to emerge on cellular immune escape mechanisms which would also be updated in the future.

## FIGURES AND TABLES

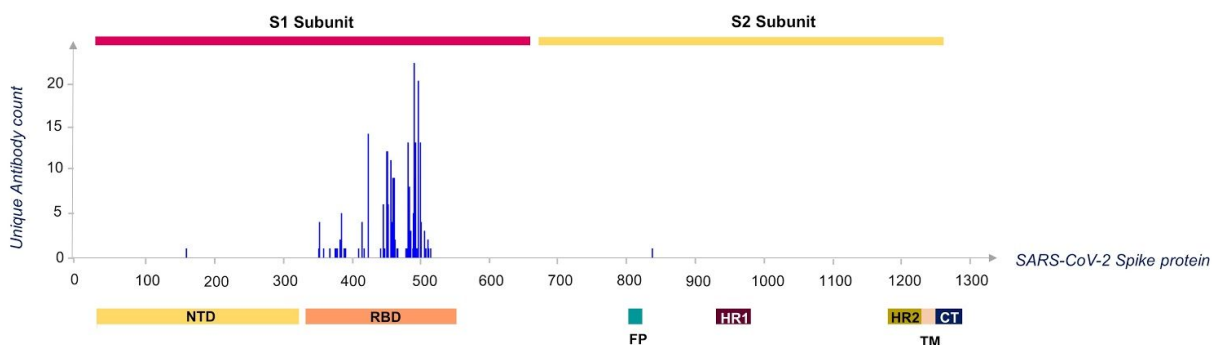

**Figure 1. SARS-CoV-2 escape mutations along the spike protein residues. Illustration of mutation - antibody associations along the Spike protein residues.**

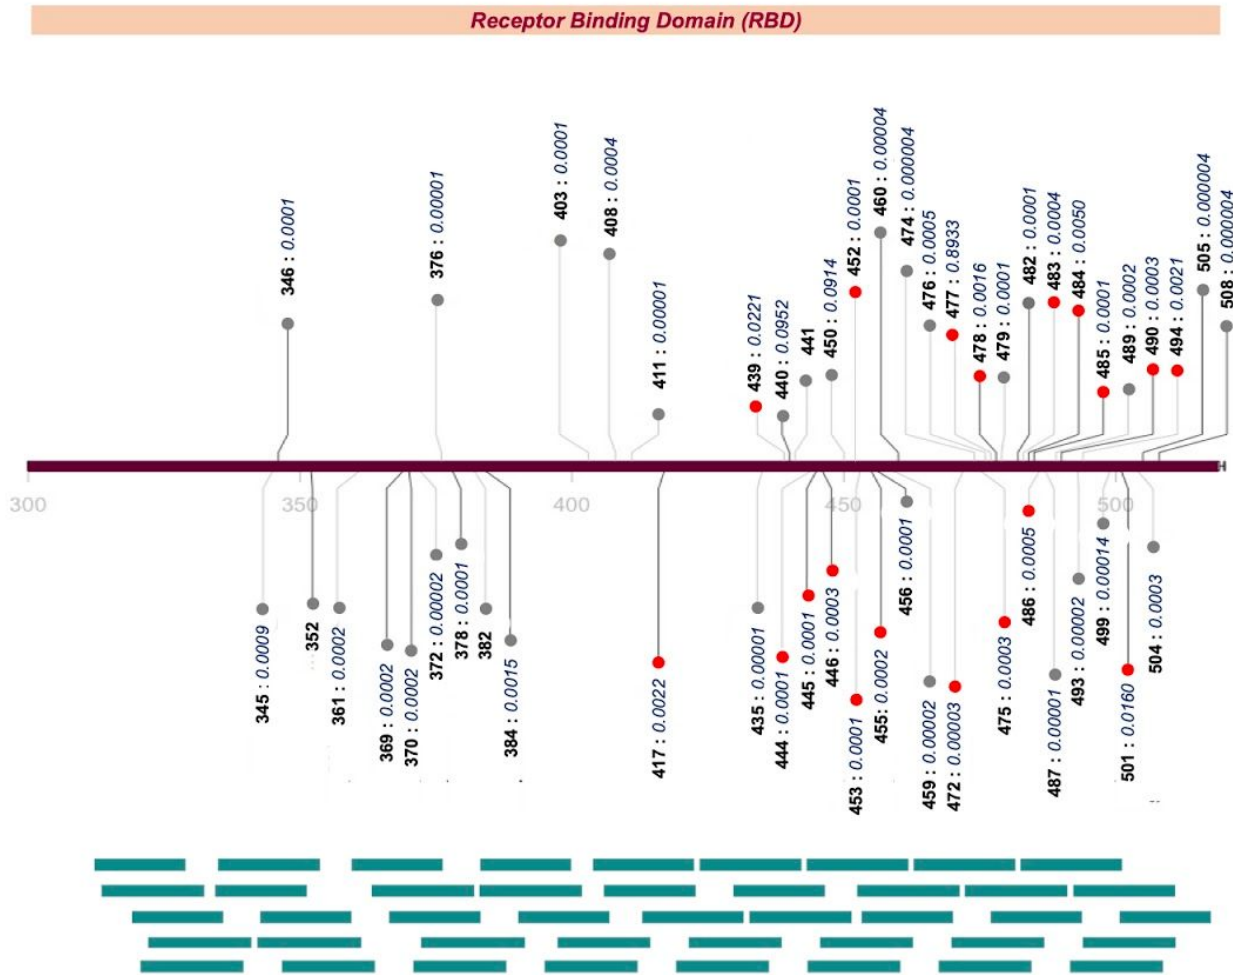

Figure 2 : Distribution of variants in Receptor binding domain of SARS-CoV-2 Spike protein. Variant sites with potential impact on neutralization of human polyclonal sera are represented in red. Cumulative frequencies of variants at RBD sites are represented along with tracks of validated epitope sites.

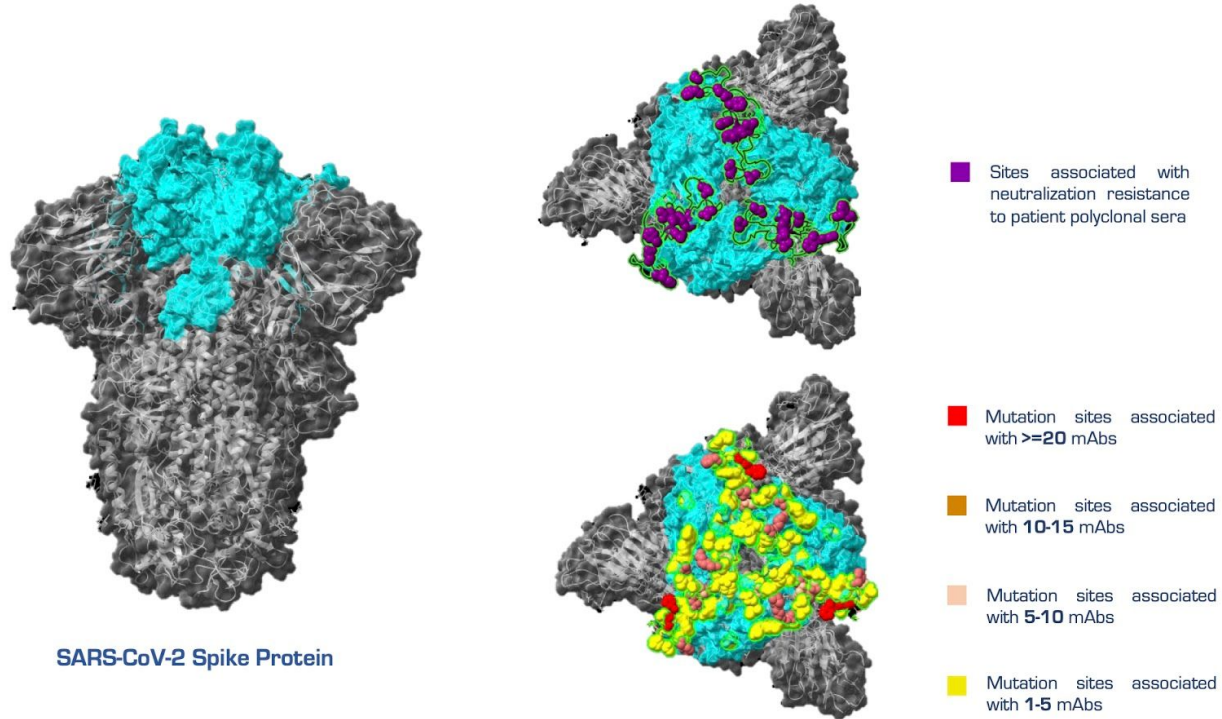

**Figure 3. Receptor Binding Domain of Spike protein with mutation hotspot sites associated with decreased neutralization against patient polyclonal sera and monoclonal antibodies.**

(A) **esc** Comprehensive resource of SARS-CoV-2 immune escape variants

About esc  
Esc (Immune escape variants in SARS-CoV-2) is a comprehensive and manually curated compendium of genetic variants in SARS-CoV-2 associated with immune escape. The data on variants and associations have been compiled from published literature as well as preprints and includes a variety of antibodies ranging from monoclonal as well as oligoclonal and convalescent plasma panels. The ESC resource provides a user friendly and searchable interface to query and understand the variants and their functional annotations in detail. This resource may not be used for clinical decision making or intervention.

Variant / Antibody name

Search

|               |           |       |        |       |
|---------------|-----------|-------|--------|-------|
| Variant       | A475V     | N440K | E484K  | K417N |
| Gene          | S         | ORF3a | ORF1ab |       |
| Antibody name | REGN10933 |       |        |       |

Use this Resource  
Mehy Pappala, Kavita Pandhare, Alia Sharmah, Mohamed Inman, Bari Jolly, Vinod Scaria. Comprehensive resource for SARS-CoV-2 immune escape variants and their annotations (Web Resource: <http://dx.doi.org/10.1101/2021.02.18.431922>)  
Related references (PANDHARE)

Last Updated : 11/02/2021  
Total number of entries compiled : 802  
Number of unique variants : 156  
Unique antibodies compiled : 13

DOWNLOAD

We sincerely acknowledge the availability of genome sequence data, authors from a range of originating and submitting labs on GISAID for collaborative efforts.

ACKNOWLEDGEMENT TABLE CAN BE DOWNLOADED HERE

(B) **VARIANT DETAILS**

|                     |               |
|---------------------|---------------|
| Variant :           | N440K         |
| Gene Name :         | S             |
| Genomic Variation : | 22882T>G      |
| Mutation Type :     | Escape mutant |

**DOMAIN AND EPIPTOPE DETAILS**

**Protein Description :**  
Spike protein is one of the structural proteins of SARS-CoV-2. The monomeric protein consists of one large ectodomain, a single-pass transmembrane anchor, and a short intracellular tail at C-terminus. It encompasses 22 glycosylation sites. S protein cleaves into two subunits namely S1 and S2 following receptor recognition. Receptor Binding Domain (RBD) in S1 subunit plays a major role in ACE2 receptor binding.

**Protein Domain :**  
Receptor Binding Domain (RBD) of SARS-CoV-2. The SARS-CoV-2 RBD has a twisted five-stranded antiparallel  $\beta$  sheet ( $\beta 1$ ,  $\beta 2$ ,  $\beta 3$ ,  $\beta 4$  and  $\beta 7$ ) with short connecting helices and loops that form the core. Between the  $\beta 4$  and  $\beta 7$  strands in the core, there is an extended insertion containing the short  $\beta 5$  and  $\beta 6$  strands,  $\alpha 1$  and  $\alpha 2$  helices and loops.

**Domain Location :**  
SARS-CoV-2 RBD (residues Arg319-Phe541)

**Domain Function :**  
Receptor Binding Domain is a vital immunogenic fragment in the Spike protein of SARS-CoV-2 virus that binds to specific endogenous receptors in the host. SARS-CoV-2 gains entry and causes infection in humans by binding to ACE2 receptor.

**Epitope Type :** Linear peptide

**IEDB Reference B cell Epitope Sequence :** KLPDFDTGCVIIVNSNLLD S (424-442)  
LPDDFTGCVIIVNSNLLD (423-442)  
VIIVNSNLLDSKVGQYNY (433-456)  
IIVNSNLLDSKVGQYNYL Y (434-453)

**IEDB B cell Epitope ID :** 1306901  
1087618  
1087772  
1308490

**IEDB Antigen Accession :** Q857161.1

**ANTIBODY DETAILS**

|                    |                                             |
|--------------------|---------------------------------------------|
| Antibody Name :    | REGN10987                                   |
| ABCD Database ID : | ABCD_A1989                                  |
| Antibody Details : | Anti-SARS-CoV-2 spike mRNA - Clinical stage |

**Experiment Details :**  
Generation of replication defective VSV pseudovirus expressing SARS-CoV-2 spike protein followed by pseudovirus neutralization assays. Mutations predicted to be potential escape variations were tested against a panel of 144 mAbs isolated from patients recovered from SARS-CoV-2 infection as well against clinical stage antibodies. #P-2-666 reduction of RBD binding was observed corresponding to this mutation.

**FUNCTIONAL ANNOTATION**

|                                         |                    |
|-----------------------------------------|--------------------|
| RefGene Function :                      | Exonic             |
| Variation Type :                        | Nononymous SNV     |
| SIFT Score :                            | 0.73               |
| SIFT Prediction :                       | Tolerated          |
| GERP :                                  | -3.3               |
| PhyloP :                                | 0.139937           |
| PhastCons :                             | 0                  |
| Uniprot Domain :                        | Distal_bond        |
| UniProt Disulphide Bond :               | DistalCoV_S1-CTD   |
| UniProt Glycophes :                     | NA                 |
| UniProt Transmembrane :                 | NA                 |
| IEDB B-Cell Epitopes :                  | NA                 |
| IEDB CD4 Epitopes :                     | NA                 |
| IEDB cd4Epitope Score :                 | NA                 |
| IEDB CD8 Epitopes :                     | NA                 |
| IEDB cd8Epitope Score :                 | NA                 |
| MPI Potential Immunogenic Regions :     | NA                 |
| MPI Potential Immunodominant Epitopes : | NA                 |
| ARTIC Primers :                         | hCoV-2019_75_RIGHT |
| RT PCR Primers Probes :                 | NA                 |
| Sequencing Error Sites :                | NA                 |
| Homoplasic Positions :                  | NA                 |
| Hypermutable Sites :                    | NA                 |

**VARIANT FREQUENCY**

|                                  |                                                                                                                                  |
|----------------------------------|----------------------------------------------------------------------------------------------------------------------------------|
| Global Variant Frequency :       | 0.0190368964                                                                                                                     |
| Variant Frequency by Geography : | Africa(0)<br>Asia(0.00052902419008)<br>Europe(0.0001218608177)<br>NorthAmerica(0)<br>Oceania(0.0001974853532)<br>SouthAmerica(0) |

**Figure 3. Panel illustrating the query search and display features in esc resource**



| Gene name | Variant  | Antibodies                                                                                                  | Ref                                                                                                                                                                  |
|-----------|----------|-------------------------------------------------------------------------------------------------------------|----------------------------------------------------------------------------------------------------------------------------------------------------------------------|
| S         | Δ146     | 4A8                                                                                                         | (McCarthy et al., 2021)                                                                                                                                              |
| S         | V483G    | SARS2-23                                                                                                    | (Liu et al.)                                                                                                                                                         |
| S         | N460K    | LY-CoV016                                                                                                   | (Shang and Axelsen)                                                                                                                                                  |
| S         | F456S    | 2B04                                                                                                        | (Liu et al.)                                                                                                                                                         |
| S         | V483I    | P2B-2F6                                                                                                     | (Shang and Axelsen)                                                                                                                                                  |
| S         | F456V    | SARS2-58                                                                                                    | (Liu et al.)                                                                                                                                                         |
| S         | P384S    | CoV2-2677                                                                                                   | (Complete Mapping of Mutations to the SARS-CoV-2 Spike Receptor-Binding Domain that Escape Antibody Recognition, 2020)                                               |
| S         | T345A    | 2H04                                                                                                        | (Liu et al.)                                                                                                                                                         |
| S         | N460S    | LY-CoV016                                                                                                   | (Shang and Axelsen)                                                                                                                                                  |
| S         | V483P    | HA001                                                                                                       | (Yi et al., 2020)                                                                                                                                                    |
| S         | N460T    | LY-CoV016                                                                                                   | (Shang and Axelsen)                                                                                                                                                  |
| S         | N439K    | H00S022,C135,LY-CoV555, Patient polyclonal sera ,REGN10933,REGN10987,S309                                   | (Barnes et al., 2020)<br>(Shang and Axelsen)<br>(Thomson et al.)(Greaney et al.)                                                                                     |
| S         | N487H    | LY-CoV016                                                                                                   | (Shang and Axelsen)                                                                                                                                                  |
| S         | Y508H    | H014                                                                                                        | (The Impact of Mutations in SARS-CoV-2 Spike on Viral Infectivity and Antigenicity, 2020)                                                                            |
| S         | V445A    | CoV2-2096,CoV2-2499,P2B-2F6,REGN10933,REGN10934,REGN10954,REGN10964,REGN10984,REGN10987,REGN10988,REGN10989 | (Baum et al., 2020)<br>(Complete Mapping of Mutations to the SARS-CoV-2 Spike Receptor-Binding Domain that Escape Antibody Recognition, 2020)<br>(Shang and Axelsen) |
| S         | N487K    | LY-CoV016,REGN10933                                                                                         | (Shang and Axelsen)                                                                                                                                                  |
| S         | Δ243-244 | 4A8                                                                                                         | (McCarthy et al., 2021)                                                                                                                                              |
| S         | T345N    | 2H04                                                                                                        | (Liu et al.)                                                                                                                                                         |
| S         | K378E    | SARS2-31                                                                                                    | (Liu et al.)                                                                                                                                                         |
| S         | V445F    | CoV2-2096,CoV2-2499,REGN10987                                                                               | (Complete Mapping of Mutations to the SARS-CoV-2 Spike Receptor-Binding Domain that Escape Antibody Recognition, 2020)<br>(Shang and Axelsen)                        |
| S         | V445G    | SARS2-22                                                                                                    | (Baum et al., 2020)                                                                                                                                                  |

|   |                     |                                                                                                                  |                                                                                                                                                                                                         |
|---|---------------------|------------------------------------------------------------------------------------------------------------------|---------------------------------------------------------------------------------------------------------------------------------------------------------------------------------------------------------|
| S | G485D               | REGN10933,REGN10934,REGN10954,REGN10964,REGN10984,REGN10987,REGN10988,REGN10989                                  | (Liu et al.)                                                                                                                                                                                            |
| S | T345S               | 2H04                                                                                                             | (Liu et al.)                                                                                                                                                                                            |
| S | V445I               | CoV2-2096,CoV2-2499                                                                                              | (Baum et al., 2020),(Shang and Axelsen)(Greaney et al. )                                                                                                                                                |
| S | L455F               | CC12.1, Patient polyclonal sera ,REGN10933,REGN10934,REGN10954,REGN10964,REGN10984,REGN10987,REGN10988,REGN10989 | (Complete Mapping of Mutations to the SARS-CoV-2 Spike Receptor-Binding Domain that Escape Antibody Recognition, 2020)                                                                                  |
| S | K417E               | REGN10933,REGN10934,REGN10954,REGN10964,REGN10984,REGN10987,REGN10988,REGN10989                                  | (Baum et al., 2020)                                                                                                                                                                                     |
| S | N501Y               | B38,C102,C105,CC12.1,COVA1-18,COVA2-15, Patient polyclonal sera,S309                                             | (Shang and Axelsen ),(Tegally et al., 2020)(Greaney et al. ),(Shen et al., 2021)                                                                                                                        |
| S | K378N               | CoV2-2082,CoV2-2094,CoV2-2677,rCR3022                                                                            | (Complete Mapping of Mutations to the SARS-CoV-2 Spike Receptor-Binding Domain that Escape Antibody Recognition, 2020)                                                                                  |
| S | T478I               | SARS2-19,SARS2-21,SARS2-71                                                                                       | (Liu et al.)                                                                                                                                                                                            |
| S | K378Q               | SARS2-31                                                                                                         | (Liu et al.)                                                                                                                                                                                            |
| S | K378R               | CoV2-2094,CoV2-2677,rCR3022                                                                                      |                                                                                                                                                                                                         |
| S | Y369C               | CoV2-2677                                                                                                        | (Andreano et al. )                                                                                                                                                                                      |
| S | K417N               | C102,C105,CC12.1,CoV2-2082,CoV2-2094,LY-CoV016, Patient polyclonal sera                                          | (Complete Mapping of Mutations to the SARS-CoV-2 Spike Receptor-Binding Domain that Escape Antibody Recognition, 2020)<br>(Shang and Axelsen)<br>(Tegally et al. 2020),(Greaney et al. ),(Cele et al. ) |
| S | 248aKTRNKSTSRRE248k | Convalescent Plasma,D14,F05,F10,F20,G12,H20,I15,I21,J13                                                          | (Complete Mapping of Mutations to the SARS-CoV-2 Spike Receptor-Binding Domain that Escape Antibody Recognition, 2020)                                                                                  |
| S | K444E               | 2H04,SARS2-21                                                                                                    | (Liu et al.)                                                                                                                                                                                            |
| S | G485R               | P2B-2F6, Patient polyclonal sera                                                                                 | (Shang and Axelsen ),(Greaney et al. )                                                                                                                                                                  |
| S | Δ141-144            | 4A8                                                                                                              | (McCarthy et al., 2021)                                                                                                                                                                                 |
| S | T376I               | CoV2-2082,CoV2-2094                                                                                              | (Liu et al.)                                                                                                                                                                                            |
| S | P479L               | SARS2-34,SARS2-71                                                                                                | (Complete Mapping of Mutations to the SARS-CoV-2 Spike Receptor-Binding Domain that Escape Antibody Recognition, 2020)                                                                                  |
| S | T478P               | SARS2-71                                                                                                         | (Liu et al.)                                                                                                                                                                                            |

|   |       |                                                                                 |                                                                                                                                             |
|---|-------|---------------------------------------------------------------------------------|---------------------------------------------------------------------------------------------------------------------------------------------|
| S | S459Y | CC12.1                                                                          | (Shang and Axelsen )                                                                                                                        |
| S | R346G | 2H04,SARS2-01                                                                   | (Complete Mapping of Mutations to the SARS-CoV-2 Spike Receptor-Binding Domain that Escape Antibody Recognition, 2020)                      |
| S | K417R | CoV2-2082,CoV2-2094                                                             | (Liu et al.)                                                                                                                                |
| S | W152L | 4A8                                                                             | (Cele et al. )                                                                                                                              |
| S | A701V | Patient Polyclonal sera                                                         | (Ip et al.)                                                                                                                                 |
| S | N370K | CoV2-2677                                                                       | (Complete Mapping of Mutations to the SARS-CoV-2 Spike Receptor-Binding Domain that Escape Antibody Recognition, 2020)                      |
| S | R346K | C135,P2B-2F6                                                                    | (Thomson et al.)                                                                                                                            |
| S | K417V | LY-CoV555,REGN10933,REGN10987,S309                                              | (Shang and Axelsen ),(Weisblum et al., 2020)                                                                                                |
| S | A352D | SARS2-01                                                                        | (Liu et al.)                                                                                                                                |
| S | R346M | C135                                                                            | (Liu et al.)                                                                                                                                |
| S | P479S | SARS2-21                                                                        | (Liu et al.)<br>(Shang and Axelsen )                                                                                                        |
| S | K444N | P2B-2F6,REGN10987,SARS2-21,SARS2-22                                             | (Weisblum et al. 2020)                                                                                                                      |
| S | C361T | rCR3022                                                                         | (Complete Mapping of Mutations to the SARS-CoV-2 Spike Receptor-Binding Domain that Escape Antibody Recognition, 2020)                      |
| S | A475P | HA001                                                                           | (Yi et al., 2020)                                                                                                                           |
| S | K444Q | REGN10933,REGN10934,REGN10954,REGN10964,REGN10984,REGN10987,REGN10988,REGN10989 | (Baum et al., 2020)                                                                                                                         |
| S | S494D | HA001                                                                           | (Yi et al., 2020)                                                                                                                           |
| S | K444R | P2B-2F6,SARS2-22                                                                | (Liu et al.)<br>(Shang and Axelsen )                                                                                                        |
| S | R408I | CC12.1,CoV2-2082,CoV2-2094                                                      | (Complete Mapping of Mutations to the SARS-CoV-2 Spike Receptor-Binding Domain that Escape Antibody Recognition, 2020),(Shang and Axelsen ) |
| S | N370S | CoV2-2677                                                                       | (Complete Mapping of Mutations to the SARS-CoV-2 Spike Receptor-Binding Domain that Escape Antibody Recognition, 2020)                      |
| S | R346S | C135                                                                            | (Barnes et al., 2020)(Weisblum et al. 2020)                                                                                                 |
| S | R408K | CoV2-2082,CoV2-2094,SARS2-31                                                    | (Complete Mapping of Mutations to the                                                                                                       |

|       |         |                                                                             |                                                                                                                                                                                                                      |
|-------|---------|-----------------------------------------------------------------------------|----------------------------------------------------------------------------------------------------------------------------------------------------------------------------------------------------------------------|
|       |         |                                                                             | SARS-CoV-2 Spike Receptor-Binding Domain that Escape Antibody Recognition, 2020)(Barnes et al., 2020) (The Impact of Mutations in SARS-CoV-2 Spike on Viral Infectivity and Antigenicity, 2020), (Shang and Axelsen) |
| S     | A475V   | 157,247,B38,C102,C105,CA1,CB6,CC12.1,CoV2-2165,CoV2-2832,LY-CoV016,P2C-1F11 | (Complete Mapping of Mutations to the SARS-CoV-2 Spike Receptor-Binding Domain that Escape Antibody Recognition, 2020) (Liu et al.)                                                                                  |
| S     | F140del | Convalescent sera ,D14,F05,F10,F20,G12,H20,I15,I21,J13                      | (Andreano et al. )                                                                                                                                                                                                   |
| ORF3a | S1498F  | Epitope loss                                                                | (Non-synonymous mutations of SARS-CoV-2 leads epitope loss and segregates its variants, 2020)                                                                                                                        |
| S     | E484A   | 1B07,2B04,CC12.1,CoV2-2050,CoV2-2479, CoV2-2832,P2B-2F6                     | (Complete Mapping of Mutations to the SARS-CoV-2 Spike Receptor-Binding Domain that Escape Antibody Recognition, 2020) (Liu et al.) (Shang and Axelsen )                                                             |
| S     | S494L   | CC12.1,P2B-2F6                                                              | (Shang and Axelsen )                                                                                                                                                                                                 |
| S     | E484D   | 1B07,CoV2-2050,CoV2-2479,CoV2-2832,SARS2-23,SARS2-66                        | (Complete Mapping of Mutations to the SARS-CoV-2 Spike Receptor-Binding Domain that Escape Antibody Recognition, 2020) (Liu et al.)                                                                                  |
| S     | S494P   | CC12.1,P2B-2F6, Patient polyclonal sera ,SARS2-01                           | (Liu et al.) (Shang and Axelsen ),(Greaney et al. )                                                                                                                                                                  |
| S     | R408T   | CoV2-2082,CoV2-2094                                                         | ((Complete Mapping of Mutations to the SARS-CoV-2 Spike Receptor-Binding Domain that Escape Antibody Recognition, 2020)                                                                                              |
| S     | L18F    | Patient polyclonal sera                                                     | (Cele et al. )                                                                                                                                                                                                       |
| S     | K450Q   | SARS2-66                                                                    | (Liu et al.)                                                                                                                                                                                                         |
| S     | G476D   | SARS2-21,SARS2-34,SARS2-71                                                  | (Liu et al.)                                                                                                                                                                                                         |
| S     | E484G   | 1B07                                                                        | (Liu et al.)                                                                                                                                                                                                         |
| S     | A435S   | CoV2-2094                                                                   | (Complete Mapping of Mutations to the SARS-CoV-2 Spike Receptor-Binding Domain that Escape Antibody Recognition, 2020)                                                                                               |
| S     | Y505C   | CC12.1                                                                      | (Shang and Axelsen )                                                                                                                                                                                                 |

|   |       |                                                                                                                                                                                                                                                           |                                                                                                                                                                                                                                                                                                                      |
|---|-------|-----------------------------------------------------------------------------------------------------------------------------------------------------------------------------------------------------------------------------------------------------------|----------------------------------------------------------------------------------------------------------------------------------------------------------------------------------------------------------------------------------------------------------------------------------------------------------------------|
| S | N440D | REGN10987                                                                                                                                                                                                                                                 | (Shang and Axelsen)                                                                                                                                                                                                                                                                                                  |
| S | D215G | Patient polyclonal sera                                                                                                                                                                                                                                   | (Cele et al. )                                                                                                                                                                                                                                                                                                       |
| S | E484K | 1B07,2B04,ABCD_AT480,ABCD_AT483,C121,C144,CC12.1,CoV2-2050,CoV2-2479,CoV2-2832,Convalescent plasma,D14,F05,F10,F20,G12,H20,I15,I21,J13,P2B-2F6,REGN10933,REGN10934,REGN10954,REGN10964,REGN10984,REGN10987,REGN10988,REGN10989,SARS2-02,SARS2-32,SARS2-55 | ( <u>Andreano et al.</u> ),(Barnes et al., 2020),(Baum et al., 2020)<br>(Complete Mapping of Mutations to the SARS-CoV-2 Spike Receptor-Binding Domain that Escape Antibody Recognition, 2020)<br>(Liu et al.)<br>(Shang and Axelsen ),(Weisblum et al. 2020),(Tegally et al. 2020),(Greaney et al. ),(Cele et al. ) |
| S | Y489H | LY-CoV016,REGN10933                                                                                                                                                                                                                                       | (Shang and Axelsen)                                                                                                                                                                                                                                                                                                  |
| S | S477G | CC12.1,SARS2-07,SARS2-16,SARS2-19,SARS2-34,SARS2-58,SARS2-71                                                                                                                                                                                              | (Liu et al.)<br>(Shang and Axelsen )                                                                                                                                                                                                                                                                                 |
| S | S477I | CC12.1,SARS2-58                                                                                                                                                                                                                                           | (Complete Mapping of Mutations to the SARS-CoV-2 Spike Receptor-Binding Domain that Escape Antibody Recognition, 2020)(Shang and Axelsen )<br>(Greaney et al. )                                                                                                                                                      |
| S | N440K | C135,REGN10987                                                                                                                                                                                                                                            | (Liu et al.)<br>(Shang and Axelsen )                                                                                                                                                                                                                                                                                 |
| S | E484Q | CC12.1,CoV2-2050,CoV2-2479,CoV2-2832, Patient polyclonal sera,P2B-2F6                                                                                                                                                                                     | (Barnes et al., 2020)<br>(Shang and Axelsen)(Weisblum et al. 2020)                                                                                                                                                                                                                                                   |
| S | F486I | REGN10933                                                                                                                                                                                                                                                 | (Shang and Axelsen)                                                                                                                                                                                                                                                                                                  |
| S | Q493K | C121,C144,LY-CoV016,REGN10933,REGN10934,REGN10954,REGN10964,REGN10984,REGN10987,REGN10988,REGN10989                                                                                                                                                       | (Baum et al., 2020)<br>(Shang and Axelsen)<br>(Weisblum et al. 2020)                                                                                                                                                                                                                                                 |
| S | S477N | CC12.1, Patient polyclonal sera,SARS2-07,SARS2-16,SARS2-19,SARS2-34,SARS2-58                                                                                                                                                                              | (Shang and Axelsen ).                                                                                                                                                                                                                                                                                                |
| S | Q493L | CC12.1,P2B-2F6,REGN10933                                                                                                                                                                                                                                  | (Liu et al.)<br>(Shang and Axelsen ),(Greaney et al. )                                                                                                                                                                                                                                                               |
| S | G476S | CC12.1,SARS2-21                                                                                                                                                                                                                                           | (Liu et al.)<br>(Shang and Axelsen )                                                                                                                                                                                                                                                                                 |
| S | F486L | CoV2-2832,HA001, Patient polyclonal sera,REGN10933,SARS2-21                                                                                                                                                                                               | (Complete Mapping of Mutations to the SARS-CoV-2 Spike Receptor-Binding Domain that Escape Antibody Recognition, 2020)<br>(Liu et al.)<br>(Shang and Axelsen)<br>,(Yi et al., 2020)(Greaney et al. )                                                                                                                 |
| S | V382L | rCR3022                                                                                                                                                                                                                                                   | (Complete Mapping of Mutations to the SARS-CoV-2 Spike Receptor-Binding                                                                                                                                                                                                                                              |

|   |            |                                                                                                                                                                  |                                                                                                                                                                                                                                                                                                                            |
|---|------------|------------------------------------------------------------------------------------------------------------------------------------------------------------------|----------------------------------------------------------------------------------------------------------------------------------------------------------------------------------------------------------------------------------------------------------------------------------------------------------------------------|
|   |            |                                                                                                                                                                  | Domain that Escape Antibody Recognition, 2020)                                                                                                                                                                                                                                                                             |
| S | S477R      | CC12.1,SARS2-07,SARS2-16,SARS2-23,SARS2-34                                                                                                                       | (Liu et al.)<br>(Shang and Axelsen)                                                                                                                                                                                                                                                                                        |
| S | N440T      | REGN10987                                                                                                                                                        | (Shang and Axelsen)                                                                                                                                                                                                                                                                                                        |
| S | Q493R      | C121,C144,LY-CoV016                                                                                                                                              | (Barnes et al., 2020)<br>(Shang and Axelsen)<br>(Weisblum et al. 2020)                                                                                                                                                                                                                                                     |
| S | L452M      | P2B-2F6, Patient polyclonal sera                                                                                                                                 | (Baum et al., 2020),(Du et al., 2020)<br>(Complete Mapping of Mutations to the SARS-CoV-2 Spike Receptor-Binding Domain that Escape Antibody Recognition, 2020)<br>(The Impact of Mutations in SARS-CoV-2 Spike on Viral Infectivity and Antigenicity, 2020)<br>(Liu et al.)<br>(Shang and Axelsen),(Weisblum et al. 2020) |
| S | F490L      | 261-262,BD-368-2,C121,CC12.1,CoV2-2050,CoV2-2479,H4,P2B-2F6,P2B2F6,REGN10933,REGN10934,REGN10954,REGN10964,REGN10984,REGN10987,REGN10988,REGN10989,SARS2-66,X593 | (Liu et al.)                                                                                                                                                                                                                                                                                                               |
| S | F486S      | SARS2-21                                                                                                                                                         | (Shang and Axelsen),(Greaney et al.)                                                                                                                                                                                                                                                                                       |
| S | N440Y      | REGN10987                                                                                                                                                        | (Shang and Axelsen)                                                                                                                                                                                                                                                                                                        |
| S | Y453F      | CC12.1, Patient polyclonal sera,REGN10933,REGN10934,REGN10954,REGN10964,REGN10984,REGN10987,REGN10988,REGN10989                                                  | (Baum et al., 2020),(Shang and Axelsen),<br>(Greaney et al.)                                                                                                                                                                                                                                                               |
| S | F486V      | REGN10933,REGN10934,REGN10954,REGN10964,REGN10984,REGN10987,REGN10988,REGN10989,SARS2-71                                                                         | (Liu et al.)                                                                                                                                                                                                                                                                                                               |
| S | 242-244del | Patient polyclonal sera                                                                                                                                          | (Cele et al.)                                                                                                                                                                                                                                                                                                              |
| S | P499H      | CoV2-2096,CoV2-2499,REGN10987                                                                                                                                    | (Complete Mapping of Mutations to the SARS-CoV-2 Spike Receptor-Binding Domain that Escape Antibody Recognition, 2020)<br>(Shang and Axelsen)                                                                                                                                                                              |
| S | L452R      | BD-368-2, Patient polyclonal sera,SARS2-01,SARS2-32                                                                                                              | (Du et al., 2020)<br>(Liu et al.)<br>(Greaney et al.)                                                                                                                                                                                                                                                                      |
| S | F486Y      | 1B07                                                                                                                                                             | (Cele et al.)                                                                                                                                                                                                                                                                                                              |
| S | D80A       | Patient polyclonal sera                                                                                                                                          | (Liu et al.)                                                                                                                                                                                                                                                                                                               |

|       |        |                                                                                                                                        |                                                                                                                                               |
|-------|--------|----------------------------------------------------------------------------------------------------------------------------------------|-----------------------------------------------------------------------------------------------------------------------------------------------|
| S     | G482S  | P2B-2F6                                                                                                                                | (Shang and Axelsen )                                                                                                                          |
|       |        |                                                                                                                                        | (Baum et al., 2020)<br>(Complete Mapping of Mutations to the SARS-CoV-2 Spike Receptor-Binding Domain that Escape Antibody Recognition, 2020) |
| S     | Q474P  | SARS2-34                                                                                                                               | (Liu et al.)<br>(Shang and Axelsen ),(Greaney et al. )                                                                                        |
| S     | F490S  | CC12.1,CoV2-2050,CoV2-2479,P2B-2F6, Patient,REGN10933,REGN10934,REGN10954, REGN10964,REGN10984,REGN10987,REG N10988,REGN10989,SARS2-32 | (Liu et al.)                                                                                                                                  |
| S     | N450D  | REGN10933,REGN10934,REGN10954,REG N10964,REGN10984,REGN10987,REGN10 988,REGN10989,SARS2-07                                             | (Baum et al., 2020)<br>(Liu et al.)                                                                                                           |
| S     | P499L  | SARS2-07                                                                                                                               | (Liu et al.)                                                                                                                                  |
| ORF3a | G251V  | Epitope Loss                                                                                                                           | (Non-synonymous mutations of SARS-CoV-2 leads epitope loss and segregates its variants, 2020)                                                 |
| S     | R403K  | CC12.1                                                                                                                                 | (Non-synonymous mutations of SARS-CoV-2 leads epitope loss and segregates its variants, 2020)                                                 |
| S     | P4715L | NA                                                                                                                                     | (Shang and Axelsen )                                                                                                                          |
| S     | R403M  | CC12.1                                                                                                                                 | (Liu et al.)<br>(Shang and Axelsen)                                                                                                           |
| S     | P499R  | CoV2-2096,CoV2-2499,REGN10987                                                                                                          | (Complete Mapping of Mutations to the SARS-CoV-2 Spike Receptor-Binding Domain that Escape Antibody Recognition, 2020)<br>(Shang and Axelsen) |
| S     | N450K  | SARS2-32                                                                                                                               | (Liu et al.)                                                                                                                                  |
| S     | N448K  | REGN10987                                                                                                                              | (Shang and Axelsen)                                                                                                                           |
| S     | G504D  | LY-CoV016,SARS2-31                                                                                                                     | (Shang and Axelsen )                                                                                                                          |
| S     | P499S  | CoV2-2096,CoV2-2499,REGN10987                                                                                                          | (Complete Mapping of Mutations to the SARS-CoV-2 Spike Receptor-Binding Domain that Escape Antibody Recognition, 2020)<br>(Shang and Axelsen) |
| S     | G446A  | CoV2-2096,CoV2-2499,REGN10987                                                                                                          | (Complete Mapping of Mutations to the SARS-CoV-2 Spike Receptor-Binding Domain that Escape Antibody Recognition, 2020)<br>(Shang and Axelsen) |
| S     | G446D  | SARS2-02,SARS2-22,SARS2-32                                                                                                             | (Liu et al.)                                                                                                                                  |

|   |       |                                                                                   |                                                                                                                                                                                   |
|---|-------|-----------------------------------------------------------------------------------|-----------------------------------------------------------------------------------------------------------------------------------------------------------------------------------|
| S | I472V | CoV2-2479                                                                         | (Complete Mapping of Mutations to the SARS-CoV-2 Spike Receptor-Binding Domain that Escape Antibody Recognition, 2020)                                                            |
| S | A831V | B38                                                                               | (The Impact of Mutations in SARS-CoV-2 Spike on Viral Infectivity and Antigenicity, 2020)                                                                                         |
| S | N450Y | SARS2-32                                                                          | (Liu et al.)                                                                                                                                                                      |
| S | A372S | CoV2-2677                                                                         | (Complete Mapping of Mutations to the SARS-CoV-2 Spike Receptor-Binding Domain that Escape Antibody Recognition, 2020)                                                            |
| S | A372T | CoV2-2677                                                                         | (Complete Mapping of Mutations to the SARS-CoV-2 Spike Receptor-Binding Domain that Escape Antibody Recognition, 2020)                                                            |
| S | A372V | CoV2-2677                                                                         | (Complete Mapping of Mutations to the SARS-CoV-2 Spike Receptor-Binding Domain that Escape Antibody Recognition, 2020)                                                            |
| S | G446S | CoV2-2096,CoV2-2499,P2B-2F6,REGN10987                                             | (Complete Mapping of Mutations to the SARS-CoV-2 Spike Receptor-Binding Domain that Escape Antibody Recognition, 2020)<br>(Shang and Axelsen)                                     |
| S | A411S | CoV2-2082                                                                         | (Complete Mapping of Mutations to the SARS-CoV-2 Spike Receptor-Binding Domain that Escape Antibody Recognition, 2020)                                                            |
| S | V483A | BD-368-2,C121,P2B-2F6                                                             | (Barnes et al., 2020),(Du et al., 2020)<br>(Shang and Axelsen)                                                                                                                    |
| S | L441R | 2H04                                                                              | (Liu et al.)                                                                                                                                                                      |
| S | G446V | CoV2-2096,CoV2-2499, Patient polyclonal sera,REGN10933,REGN10987,SARS2-02,P2B-2F6 | (Complete Mapping of Mutations to the SARS-CoV-2 Spike Receptor-Binding Domain that Escape Antibody Recognition, 2020)<br>(Liu et al.)<br>(Shang and Axelsen)<br>(Greaney et al.) |
| S | P384L | CoV2-2677                                                                         | (Complete Mapping of Mutations to the SARS-CoV-2 Spike Receptor-Binding Domain that Escape Antibody Recognition, 2020)                                                            |
| S | N460I | LY-CoV016                                                                         | (Shang and Axelsen)                                                                                                                                                               |
| S | V483F | P2B-2F6,SARS2-23                                                                  | (Liu et al.)                                                                                                                                                                      |



|  |  |                     |
|--|--|---------------------|
|  |  | (Shang and Axelsen) |
|--|--|---------------------|

**Table 1. Summary of variants compiled in the study along with their associated list of anti SARS-CoV-2 antibodies**

## SUPPLEMENTARY DATASETS

|                                                         |
|---------------------------------------------------------|
| <b>Custom Datasets</b>                                  |
| <b>Variation Type</b>                                   |
| <i>Non synonymous variant</i>                           |
| <i>Synonymous variant</i>                               |
| <b>SIFT_Score</b>                                       |
| <b>SIFT_Prediction</b> ( <i>Deleterious/Tolerable</i> ) |
| <b>GERP</b>                                             |
| <b>PhyloP</b>                                           |
| <b>PhastCons</b>                                        |
| <b>Uniprot_Domains</b>                                  |
| <b>UNIPROT_Disulphite_Bond</b>                          |
| <b>UNIPROT_glyphos</b>                                  |
| <b>UNIPROT_Transmembrane</b>                            |
| <b>IEDB_B-Cell_Epitopes</b>                             |
| <b>IEDB_CD4_Epitopes</b>                                |
| <b>IEDB_cd4Epitope_Score</b>                            |
| <b>IEDB_CD8_Epitopes</b>                                |
| <b>IEDB_cd8Epitope_Score</b>                            |
| <b>MPDI_Potential_Immunogenic_Regions</b>               |
| <b>MPDI_Potential_Immunodominant_Epitopes</b>           |
| <b>ARTIC_Primer</b> s                                   |
| <b>RT-PCR_Primer</b> s/ <b>Probes</b>                   |
| <b>Sequencing_Error_Sites</b>                           |
| <b>Homoplasic_Positions</b>                             |
| <b>Hypermutable_Sites</b>                               |

**Supplementary Table 1.** Summary of variants mapping to various annotation features.

## REFERENCES

Barnes, C. O., Jette, C. A., Abernathy, M. E., Dam, K.-M. A., Esswein, S. R., Gristick, H. B., et al.

(2020). Structural classification of neutralizing antibodies against the SARS-CoV-2 spike receptor-binding domain suggests vaccine and therapeutic strategies. *bioRxiv*. doi:10.1101/2020.08.30.273920.

Baum, A., Fulton, B. O., Wloga, E., Copin, R., Pascal, K. E., Russo, V., et al. (2020). Antibody cocktail to SARS-CoV-2 spike protein prevents rapid mutational escape seen with individual antibodies. *Science* 369, 1014–1018.

Biswas, A., Bhattacharjee, U., Chakrabarti, A. K., Tewari, D. N., Banu, H., and Dutta, S. (2020). Emergence of Novel Coronavirus and COVID-19: whether to stay or die out? *Critical Reviews in Microbiology* 46, 182–193. doi:10.1080/1040841x.2020.1739001.

Chen, F. Z., You, L. J., Yang, F., Wang, L. N., Guo, X. Q., Gao, F., et al. (2020). CNGBdb: China National GeneBank DataBase. *Yi Chuan* 42, 799–809.

Complete Mapping of Mutations to the SARS-CoV-2 Spike Receptor-Binding Domain that Escape Antibody Recognition (2020). *Cell Host Microbe*. doi:10.1016/j.chom.2020.11.007.

Cooper, G. M. (2005). Distribution and intensity of constraint in mammalian genomic sequence. *Genome Research* 15, 901–913. doi:10.1101/gr.3577405.

Du, S., Cao, Y., Zhu, Q., Yu, P., Qi, F., Wang, G., et al. (2020). Structurally Resolved SARS-CoV-2 Antibody Shows High Efficacy in Severely Infected Hamsters and Provides a Potent Cocktail Pairing Strategy. *Cell* 183, 1013–1023.e13.

Farrera-Soler, L., Daguer, J.-P., Barluenga, S., Vadas, O., Cohen, P., Pagano, S., et al. (2020). Identification of immunodominant linear epitopes from SARS-CoV-2 patient plasma. *PLoS One* 15, e0238089.

GenBank Overview Available at: <https://www.ncbi.nlm.nih.gov/genbank/> [Accessed December 19, 2020].

Genome Warehouse Available at: <https://www.re3data.org/repository/r3d100013428> [Accessed December 19, 2020].

Greaney, A. J., Loes, A. N., Crawford, K. H. D., Starr, T. N., Malone, K. D., Chu, H. Y., et al. Comprehensive mapping of mutations to the SARS-CoV-2 receptor-binding domain that affect recognition by polyclonal human serum antibodies. doi:10.1101/2020.12.31.425021.

Ip, J. D., Kok, K.-H., Chan, W.-M., Chu, A. W.-H., Wu, W.-L., Yip, C. C.-Y., et al. Intra-host non-synonymous diversity at a neutralizing antibody epitope of SARS-CoV-2 spike protein N-terminal domain. *Clin. Microbiol. Infect.* doi:10.1016/j.cmi.2020.10.030.

Jain, A., Rophina, M., Mahajan, S., Krishnan, B. B., Sharma, M., Mandal, S., et al. (2020). Analysis of the potential impact of genomic variants in SARS-CoV-2 genomes from India on molecular diagnostic assays. *Cold Spring Harbor Laboratory*, 2020.08.05.238618. doi:10.1101/2020.08.05.238618.

Jespersen, M. C., Peters, B., Nielsen, M., and Marcatili, P. (2017). BepiPred-2.0: improving sequence-based B-cell epitope prediction using conformational epitopes. *Nucleic Acids*

Res. 45, W24–W29.

Jiang, S., Hillyer, C., and Du, L. (2020). Neutralizing Antibodies against SARS-CoV-2 and Other Human Coronaviruses. *Trends in Immunology* 41, 545. doi:10.1016/j.it.2020.04.008.

Korber, B., Fischer, W. M., Gnanakaran, S., Yoon, H., Theiler, J., Abfalterer, W., et al. (2020). Tracking Changes in SARS-CoV-2 Spike: Evidence that D614G Increases Infectivity of the COVID-19 Virus. *Cell* 182, 812–827.e19.

Lima, W. C., Gasteiger, E., Marcatili, P., Duek, P., Bairoch, A., and Cosson, P. (2020). The ABCD database: a repository for chemically defined antibodies. *Nucleic Acids Res.* 48, D261–D264.

Liu, Z., VanBlargan, L. A., Rothlauf, P. W., Bloyet, L.-M., Chen, R. E., Stumpf, S., et al. Landscape Analysis of Escape Variants Identifies SARS-CoV-2 Spike Mutations that Attenuate Monoclonal and Serum Antibody Neutralization. *SSRN Electronic Journal*. doi:10.2139/ssrn.3725763.

McCarthy, K. R., Rennick, L. J., Nambulli, S., Robinson-McCarthy, L. R., Bain, W. G., Haidar, G., et al. (2021). Recurrent deletions in the SARS-CoV-2 spike glycoprotein drive antibody escape. *Science*. doi:10.1126/science.abf6950.

Nelson, G., Buzko, O., Spilman, P., Niazi, K., Rabizadeh, S., and Soon-Shiong, P. (2021). Molecular dynamic simulation reveals E484K mutation enhances spike RBD-ACE2 affinity and the combination of E484K, K417N and N501Y mutations (501Y.V2 variant) induces conformational change greater than N501Y mutant alone, potentially resulting in an escape mutant. *Cold Spring Harbor Laboratory*, 2021.01.13.426558. doi:10.1101/2021.01.13.426558.

Ng, P. C., and Henikoff, S. (2003). SIFT: Predicting amino acid changes that affect protein function. *Nucleic Acids Res.* 31, 3812–3814.

NicolaDeMaio, n\_j\_loman, and goldman (2020). Issues with SARS-CoV-2 sequencing data. Available at: <https://virological.org/t/issues-with-sars-cov-2-sequencing-data/473> [Accessed December 24, 2020].

Non-synonymous mutations of SARS-CoV-2 leads epitope loss and segregates its variants (2020). *Microbes Infect.* 22, 598–607.

Page, A. J., Taylor, B., Delaney, A. J., Soares, J., Seemann, T., Keane, J. A., et al. (2016). : rapid efficient extraction of SNPs from multi-FASTA alignments. *Microb Genom* 2, e000056.

Pickett, B., Greer, D., Zhang, Y., Stewart, L., Zhou, L., Sun, G., et al. (2012). Virus Pathogen Database and Analysis Resource (ViPR): A Comprehensive Bioinformatics Database and Analysis Resource for the Coronavirus Research Community. *Viruses* 4, 3209–3226. doi:10.3390/v4113209.

Pollard, K. S., Hubisz, M. J., Rosenbloom, K. R., and Siepel, A. (2010). Detection of nonneutral substitution rates on mammalian phylogenies. *Genome Res.* 20, 110–121.

- Rophina, M., Pandhare, K., Mangla, M., Shamnath, A., Jolly, B., Sethi, M., et al. FaviCoV -a comprehensive manually curated resource for functional genetic variants in SARS-CoV-2. doi:10.31219/osf.io/wp5tx.
- Shang, E., and Axelsen, P. The Potential for SARS-CoV-2 to Evade Both Natural and Vaccine-induced Immunity. doi:10.1101/2020.12.13.422567.
- Shen, X., Tang, H., McDanal, C., Wagh, K., Fischer, W., Theiler, J., et al. (2021). SARS-CoV-2 variant B.1.1.7 is susceptible to neutralizing antibodies elicited by ancestral Spike vaccines. *bioRxiv*. doi:10.1101/2021.01.27.428516.
- Shu, Y., and McCauley, J. (2017). GISAID: Global initiative on sharing all influenza data - from vision to reality. *Euro Surveill.* 22. doi:10.2807/1560-7917.ES.2017.22.13.30494.
- Siepel, A., and Haussler, D. Phylogenetic Hidden Markov Models. *Statistical Methods in Molecular Evolution*, 325–351. doi:10.1007/0-387-27733-1\_12.
- Tang, X., Wu, C., Li, X., Song, Y., Yao, X., Wu, X., et al. (2020). On the origin and continuing evolution of SARS-CoV-2. *National Science Review* 7, 1012–1023. doi:10.1093/nsr/nwaa036.
- Tegally, H., Wilkinson, E., Giovanetti, M., Iranzadeh, A., Fonseca, V., Giandhari, J., et al. (2020). Emergence and rapid spread of a new severe acute respiratory syndrome-related coronavirus 2 (SARS-CoV-2) lineage with multiple spike mutations in South Africa. *medRxiv*, 2020.12.21.20248640.
- The Impact of Mutations in SARS-CoV-2 Spike on Viral Infectivity and Antigenicity (2020). *Cell* 182, 1284–1294.e9.
- Thomson, E. C., Rosen, L. E., Shepherd, J. G., Spreafico, R., da Silva Filipe, A., Wojcechowskyj, J. A., et al. The circulating SARS-CoV-2 spike variant N439K maintains fitness while evading antibody-mediated immunity. doi:10.1101/2020.11.04.355842.
- Vita, R., Mahajan, S., Overton, J. A., Dhanda, S. K., Martini, S., Cantrell, J. R., et al. (2019a). The Immune Epitope Database (IEDB): 2018 update. *Nucleic Acids Res.* 47, D339–D343.
- Vita, R., Mahajan, S., Overton, J. A., Dhanda, S. K., Martini, S., Cantrell, J. R., et al. (2019b). The Immune Epitope Database (IEDB): 2018 update. *Nucleic Acids Res.* 47, D339–D343.
- Wang, K., Li, M., and Hakonarson, H. (2010). ANNOVAR: functional annotation of genetic variants from high-throughput sequencing data. *Nucleic Acids Research* 38, e164–e164. doi:10.1093/nar/gkq603.
- Weisblum, Y., Schmidt, F., Zhang, F., DaSilva, J., Poston, D., Lorenzi, J. C. C., et al. (2020). Escape from neutralizing antibodies by SARS-CoV-2 spike protein variants. doi:10.7554/eLife.61312.
- Williams, T. C., and Burgers, W. A. (2021). SARS-CoV-2 evolution and vaccines: cause for concern? *Lancet Respir Med.* doi:10.1016/S2213-2600(21)00075-8.
- Yi, C., Sun, X., Ye, J., Ding, L., Liu, M., Yang, Z., et al. (2020). Key residues of the receptor binding

motif in the spike protein of SARS-CoV-2 that interact with ACE2 and neutralizing antibodies. *Cell. Mol. Immunol.* 17, 621–630.

Zhang, Y.-Z., and Holmes, E. C. (2020). A Genomic Perspective on the Origin and Emergence of SARS-CoV-2. *Cell* 181, 223–227.
